# Supplementary material for: Representation of racialised and ethnically diverse populations in multicentre randomised controlled trials of GLP-1 medicines for obesity: a systematic review and meta-analysis of gaps
Source: PubMed Central journal article supplement — BMJ Glob Health. 2024 Nov 28;9(11):e017177. doi: 10.1136/bmjgh-2024-017177 (PMC11603712; doi:10.1136/bmjgh-2024-017177), 2024-11-28
Supplement: bmjgh-9-11-s001.pdf [file bmjgh-9-11-s001.pdf]

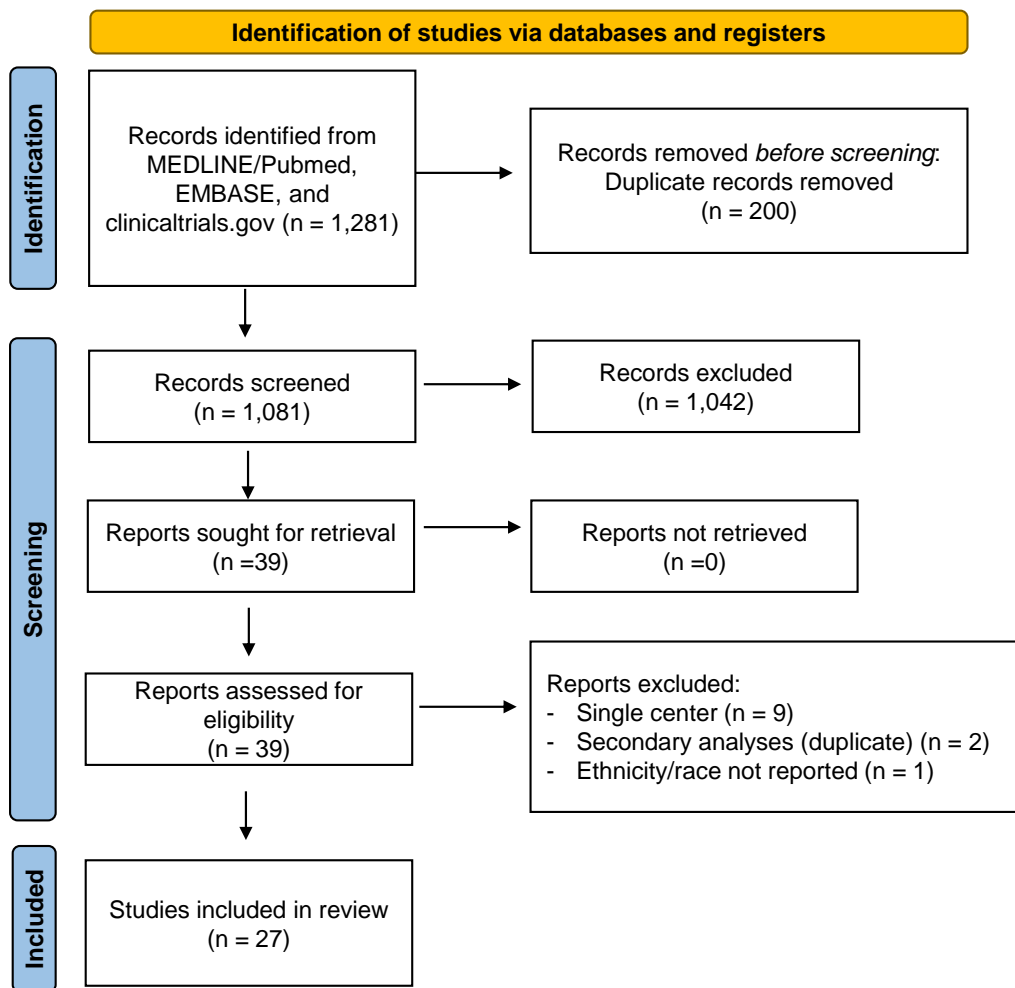

**Online Figure 1.** Flow diagram of the literature search to identify multicenter randomized controlled trials evaluating the impact of incretin-based therapies on weight loss

**Online Table 1.** Assessment of risk of bias for each included study: risk of bias in randomized trials (RoB 2).

| Study            | Risk of bias domains |                                       |                      |                             |                              | Overall |
|------------------|----------------------|---------------------------------------|----------------------|-----------------------------|------------------------------|---------|
|                  | Randomization        | Deviations from intended intervention | Missing outcome data | Measurements of the outcome | Selection of reported result |         |
| Wadden et al     | Low                  | Low                                   | Low                  | Low                         | Low                          | Low     |
| Davies et al     | Low                  | Low                                   | Low                  | Low                         | Low                          | Low     |
| Pi-Sunyer et al  | Low                  | Low                                   | Low                  | Low                         | Low                          | Low     |
| O'Neil et al     | Low                  | Low                                   | Low                  | Low                         | Low                          | Low     |
| Garvey et al     | Low                  | Low                                   | Low                  | Low                         | Low                          | Low     |
| Wadden et al     | Low                  | Low                                   | Low                  | Low                         | Low                          | Low     |
| Alba et al       | Low                  | Low                                   | Low                  | Low                         | Low                          | Low     |
| Davies et al     | Low                  | Low                                   | Low                  | Low                         | Low                          | Low     |
| Nahra et al      | Low                  | Low                                   | Low                  | Low                         | Low                          | Low     |
| Rubino et al     | Low                  | Low                                   | Low                  | Low                         | Low                          | Low     |
| Wadden et al     | Low                  | Low                                   | Low                  | Low                         | Low                          | Low     |
| Wilding et al    | Low                  | Low                                   | Low                  | Low                         | Low                          | Low     |
| Garvey et al     | Low                  | Low                                   | Low                  | Low                         | Low                          | Low     |
| Kadowaki et al   | Low                  | Low                                   | Low                  | Low                         | Low                          | Low     |
| Jastreboff et al | Low                  | Low                                   | Low                  | Low                         | Low                          | Low     |
| Rubino et al     | Low                  | Low                                   | Low                  | Low                         | Low                          | Low     |
| Garvey et al     | Low                  | Low                                   | Low                  | Low                         | Low                          | Low     |

|                  |     |     |     |     |     |     |
|------------------|-----|-----|-----|-----|-----|-----|
| Jastreboff et al | Low | Low | Low | Low | Low | Low |
| Kosiborod et al  | Low | Low | Low | Low | Low | Low |
| Knop et al       | Low | Low | Low | Low | Low | Low |
| Mok et al        | Low | Low | Low | Low | Low | Low |
| Wadden et al     | Low | Low | Low | Low | Low | Low |
| Wharton et al    | Low | Low | Low | Low | Low | Low |
| Aronne et al     | Low | Low | Low | Low | Low | Low |
| Kosiborod et al  | Low | Low | Low | Low | Low | Low |
| Le Roux et al    | Low | Low | Low | Low | Low | Low |
| Mu et al         | Low | Low | Low | Low | Low | Low |
